# Supplementary material
Source: Research Square preprint supplement (doi:10.21203/rs.3.rs-8913178/v1)
Supplement: Supplementary file 1 [file 6db6866220420d09e1c35b1b.docx]

**Supplementary Material**

**Chimeric 3D Model of EGFR and VEGFR-2 for the Discovery of Dual Inhibitors.**

Harold H. Fokoue1, Lucas S. Franco2,3, Rodolfo C. Maia4, Eliezer J. Barreiro3, Carlos M. R. Sant’Anna5*

1 Centro de Energia Nuclear na Agricultura. Universidade de São Paulo, Av. Centenário, 303 – São Dimas, CEP:13416-000 - Piracicaba, SP, Brazil

2 Instituto Nacional de Ciência e Tecnologia de Fármacos e Medicamentos (INCT-INOFAR; http://www.inct-inofar.ccs.ufrj.br/), Laboratório de Avaliação e Síntese de Substâncias Bioativas (LASSBio®, http://www.lassbio.icb.ufrj.br), Universidade Federal do Rio de Janeiro, CCS, Cidade Universitária, 21941-902 Rio de Janeiro, RJ, Brazil.

3 Programa de Pós-Graduação em Farmacologia e Química Medicinal, Instituto de Ciências Biomédicas, Universidade Federal do Rio de Janeiro, CCS, Cidade Universitária, 21941-902 Rio de Janeiro, RJ, Brazil.

4 Selvita, Podole 79, 30-394, Kraków, Poland.

5 Departamento de Química Fundamental, Instituto de Química, Universidade Federal Rural do Rio de Janeiro, 23970-000 Seropédica, RJ, Brazil.

*Corresponding author, e-mail: [santanna@ufrrj.br](mailto:santanna@ufrrj.br)

**Table S1** Selected duals and non-duals compounds for 3D model validation (validation library)

| Compound | EGFRwt  (IC50, µM) | VEGFR-2  (IC50, µM) | Dual (Y/N) |
| --- | --- | --- | --- |
| Sorafenib1 | 0.01 | 0.08 | Y |
| Vandetanib2 | 0.80 | 0.10 | Y |
| 12 | 5.70 | 1.65 | Y |
| 22 | 6.90 | 5.80 | Y |
| 32 | >10 | 5.60 | N |
| 42 | 7.05 | 5.00 | Y |
| 52 | 0.80 | 6.80 | Y |
| 62 | 4.00 | 0.85 | Y |
| 72 | 7.20 | 7.80 | Y |
| 82 | 0.90 | 0.65 | Y |
| 92 | 5.00 | 6.50 | Y |
| 102 | 0.90 | 0.85 | Y |
| 112 | 7.60 | 5.20 | Y |
| 122 | 6.15 | 5.05 | Y |
| 132 | >10 | >10 | N |
| 142 | 0.90 | 0.50 | Y |
| 152 | 0.90 | 5.55 | Y |
| 162 | 1.00 | 3.30 | Y |
| 172 | 6.40 | 4.90 | Y |
| 182 | >10 | 9.90 | N |
| 192 | >10 | 5.40 | N |
| 202 | >10 | 9.20 | N |
| 212 | >10 | >10 | N |
| 222 | >10 | >10 | N |
| 232 | >10 | 4.30 | N |
| 242 | >10 | 6.80 | N |
| 252 | >10 | 3.70 | N |
| 262 | >10 | 7.20 | N |
| 272 | >10 | 0.90 | N |
| 282 | 3.90 | 0.50 | Y |
| 292 | >10 | 5.70 | N |
| 302 | >10 | 3.30 | N |
| 312 | >10 | 0.80 | N |
| 322 | 9.80 | 4.80 | Y |
| 331 | >10 | >10 | N |
| 341 | >10 | >10 | N |
| 351 | 0.73 | >10 | N |
| 361 | >10 | >10 | N |
| 371 | >10 | >10 | N |
| 381 | 0.13 | 0.56 | Y |
| 391 | 1.33 | 1.86 | Y |
| 401 | 0.69 | 0.87 | Y |
| 411 | 1.11 | 2.02 | Y |
| 421 | 4.61 | 4.72 | Y |
| 431 | 1.35 | 2.62 | Y |
| 441 | >10 | 4.19 | N |
| 451 | 0.76 | 2.00 | Y |
| 461 | >10 | 2.48 | N |
| 471 | 0.30 | 1.99 | Y |
| 483 | 9.70 | 7.79 | Y |
| 493 | >10 | >10 | N |
| 504 | >10 | >10 | N |
| 514 | >10 | >10 | N |
| 524 | >10 | >10 | N |
| 534 | >10 | >10 | N |
| 544 | >10 | >10 | N |
| 554 | >10 | >10 | N |
| 563 | >10 | >10 | N |
| 573 | >10 | >10 | N |
| 583 | >10 | >10 | N |
| 593 | >10 | >10 | N |
| 603 | >10 | >10 | N |
| 613 | >10 | >10 | N |
| 623 | >10 | >10 | N |
| 633 | 2.37 | 1.02 | Y |
| 643 | >10 | >10 | N |
| 653 | 1.63 | 0.85 | Y |
| 663 | >10 | >10 | N |
| 673 | >10 | >10 | N |
| 683 | 0.90 | 1.17 | Y |
| 693 | >10 | 1.99 | N |
| 703 | 4.30 | 2.10 | Y |

Y: dual compound; N:non-dual compound;

1Med. Chem. Commun.,**2011**, 2, 65-72.

2Eur. J. Med. Chem., **2016**, 109, 371-379.

3Eur. J. Med. Chem., **2014**, 71, 1-14

4Barbosa, M. L., *Tese de Doutorado*, IQ-UFRJ, **2013**.

**Table S2** Goldscore function score of the selected 10% of the bestranked

compounds of the validation library.

| Compound | GoldScore score | EGFRwt  (IC50, µM) | VEGFR-2  (IC50, µM) | Dual (Y/N) |
| --- | --- | --- | --- | --- |
| **47** | 91,58 | 0.30 | 1.99 | Y |
| **32** | 88,55 | 9.80 | 4.80 | Y |
| **45** | 88,03 | 0.76 | 2.00 | Y |
| **26** | 87,99 | >10 | 7.20 | N |
| **43** | 87,94 | 1.35 | 2.62 | Y |
| **29** | 87,56 | >10 | 5.70 | N |
| **44** | 87,25 | >10 | 4.19 | N |

**Table S3** Goldscore function score of the selected 10% of the best-ranked compounds of the LASSBio chemical library.

| Compound | GoldScore score |
| --- | --- |
| LASSBio-1616 | 87.87 |
| LASSBio-460 | 87.74 |
| LASSBio-457 | 87.26 |
| LASSBio-458 | 83.4 |
| LASSBio-1507 | 80.55 |
| LASSBio-338 | 79.24 |
| LASSBio-487 | 79.14 |
| LASSBio-1535 | 78.79 |
| LASSBio-340 | 78.64 |
| LASSBio-1002 | 78.33 |
| LASSBio-489 | 78.27 |
| LASSBio-1615 | 78.23 |
| LASSBio-1698 | 77.63 |
| LASSBio-558 | 77.59 |
| LASSBio-339 | 77.57 |
| LASSBio-459 | 77.49 |
| LASSBio-456 | 77.49 |
| LASSBio-1462 | 76.94 |
| LASSBio-341 | 75.75 |
| LASSBio-225 | 75.46 |
| LASSBio-1968 | 75.18 |
| LASSBio-1697 | 74.83 |
| LASSBio-1974 | 74.66 |
| LASSBio-61 | 73.8 |
| LASSBio-488 | 73.57 |
| LASSBio-1075 | 72.97 |
| LASSBio-187 | 72.76 |
| LASSBio-987 | 72.66 |
| LASSBio-1857 | 72.19 |
| LASSBio-1151 | 72.19 |
| LASSBio-557 | 72.13 |
| LASSBio-1170 | 71.87 |
| LASSBio-1726 | 71.8 |
| LASSBio-1695 | 71.75 |
| LASSBio-60 | 71.69 |
| LASSBio-559 | 71.52 |
| LASSBio-239 | 71.47 |
| LASSBio-224 | 71.38 |
| LASSBio-1145 | 70.97 |




















**Fig.S1** Structure of the dual and non-dual compounds (Validation library)


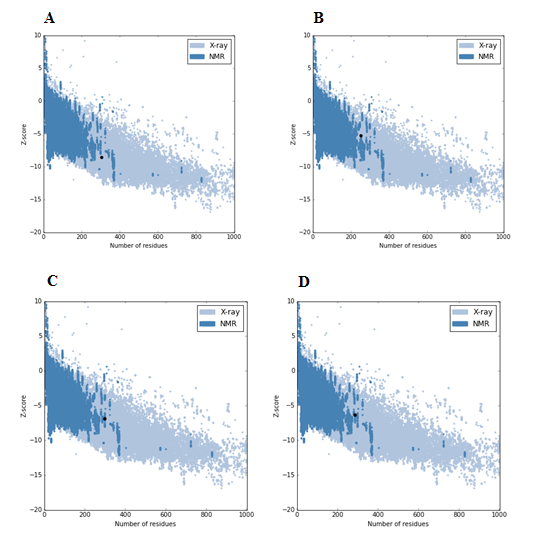


**Fig. S2** Z-score plot calculated by ProSA-web server correlating the template structure 4ASE (A) and the 3D model based on 2ITY sequence (B) with 3D structures experimentally elucidated by X-ray crystallography or nuclear magnetic resonance. Z-score plot calculated by ProSA-web server correlating the template structure 2ITY (C) and the 3D model based on 4ASE sequence (D) with 3D structures experimentally elucidated by X-ray crystallography or nuclear magnetic resonance.


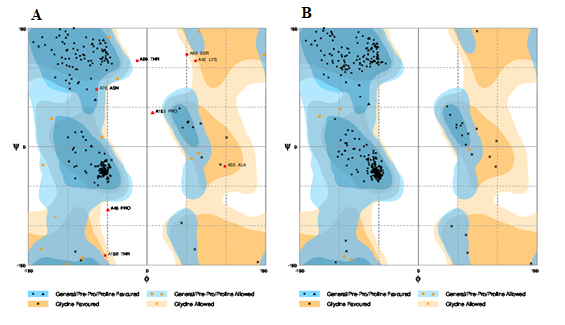


**Fig. S3** Ramachandran plot of the 3D model based on 2ITY sequence (A) in comparison with the template 4ASE (B) obtained with RAMPAGE server


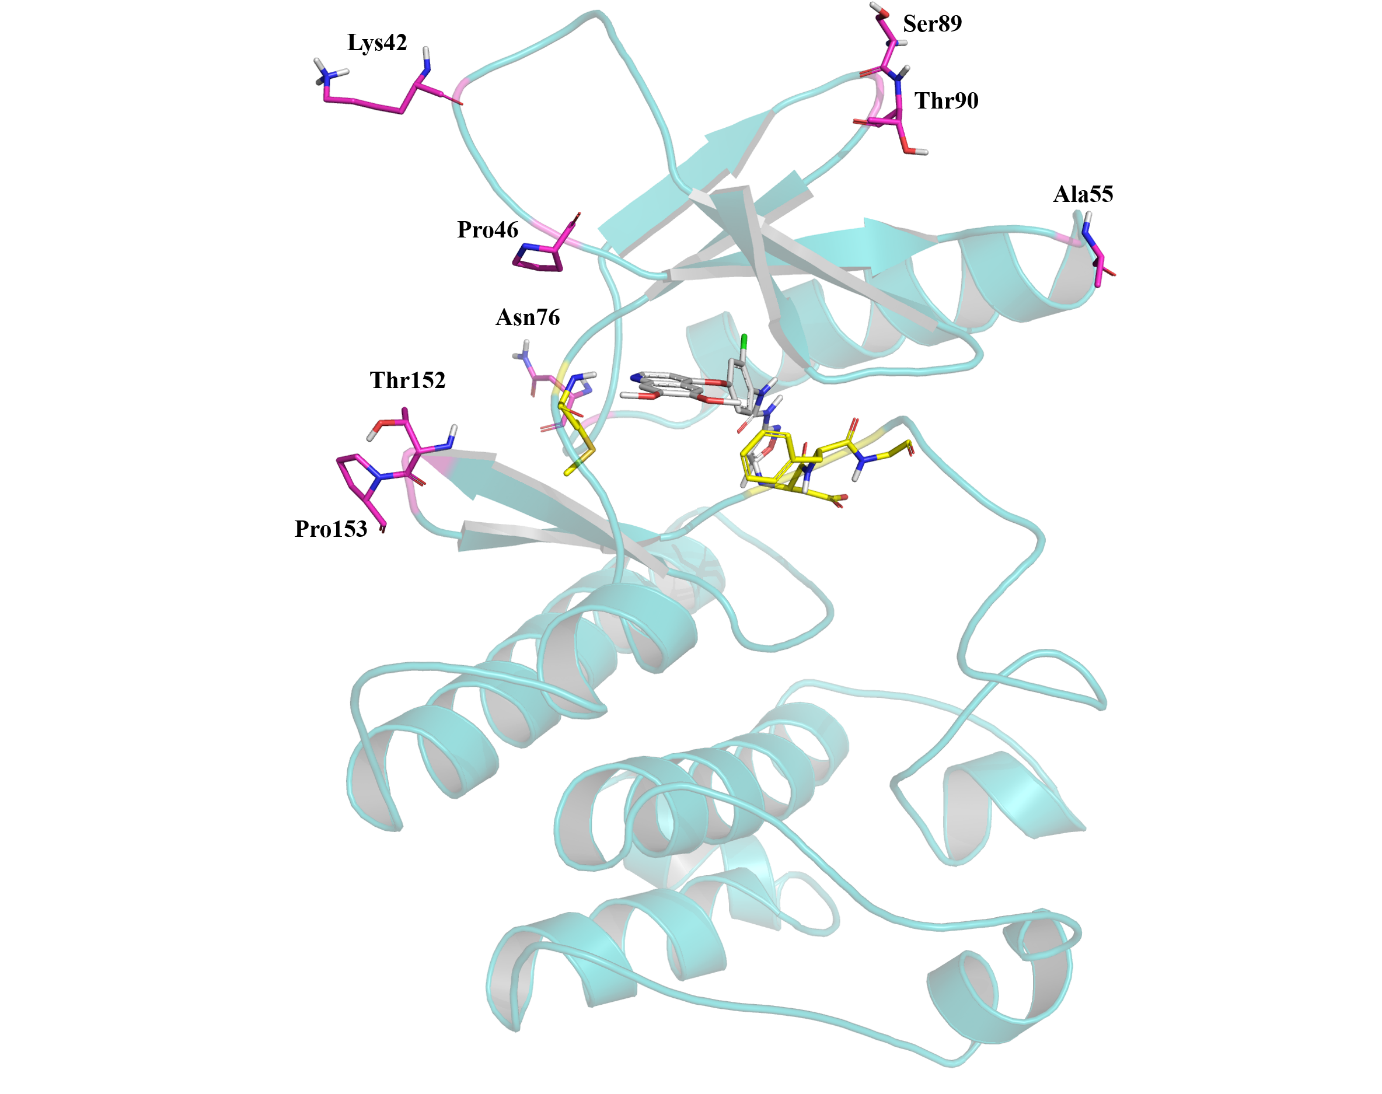


**Fig.S4** 3D model based on 2ITY sequence superposed with tivozanib in complex with the template (4ASE). Carbons atoms in White: tivozanibe (ligand); Magenta: amino acids presented in disallowed region of the Ramachandran plot; Yellow: Methionine of the *Hinge region* e amino acids of the DFG motif (aspartate, Phenylalanine e glycine) (Plotted with PyMol program.(ref: The PyMOL Molecular Graphics System, Version 1.8 Schrödinger, LLC.)


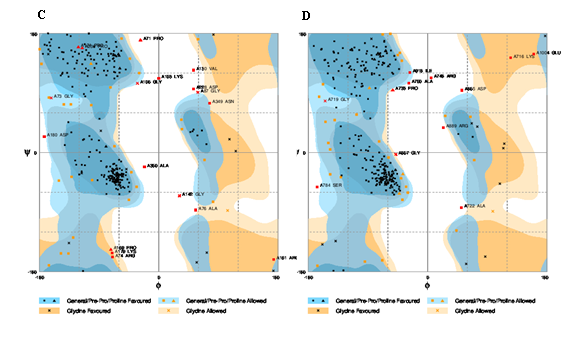


**Fig. S5**Ramachandran plot of the 3D model based on 4ASE sequence (C) in comparison with the template 2ITY (D) obtained with RAMPAGE server.


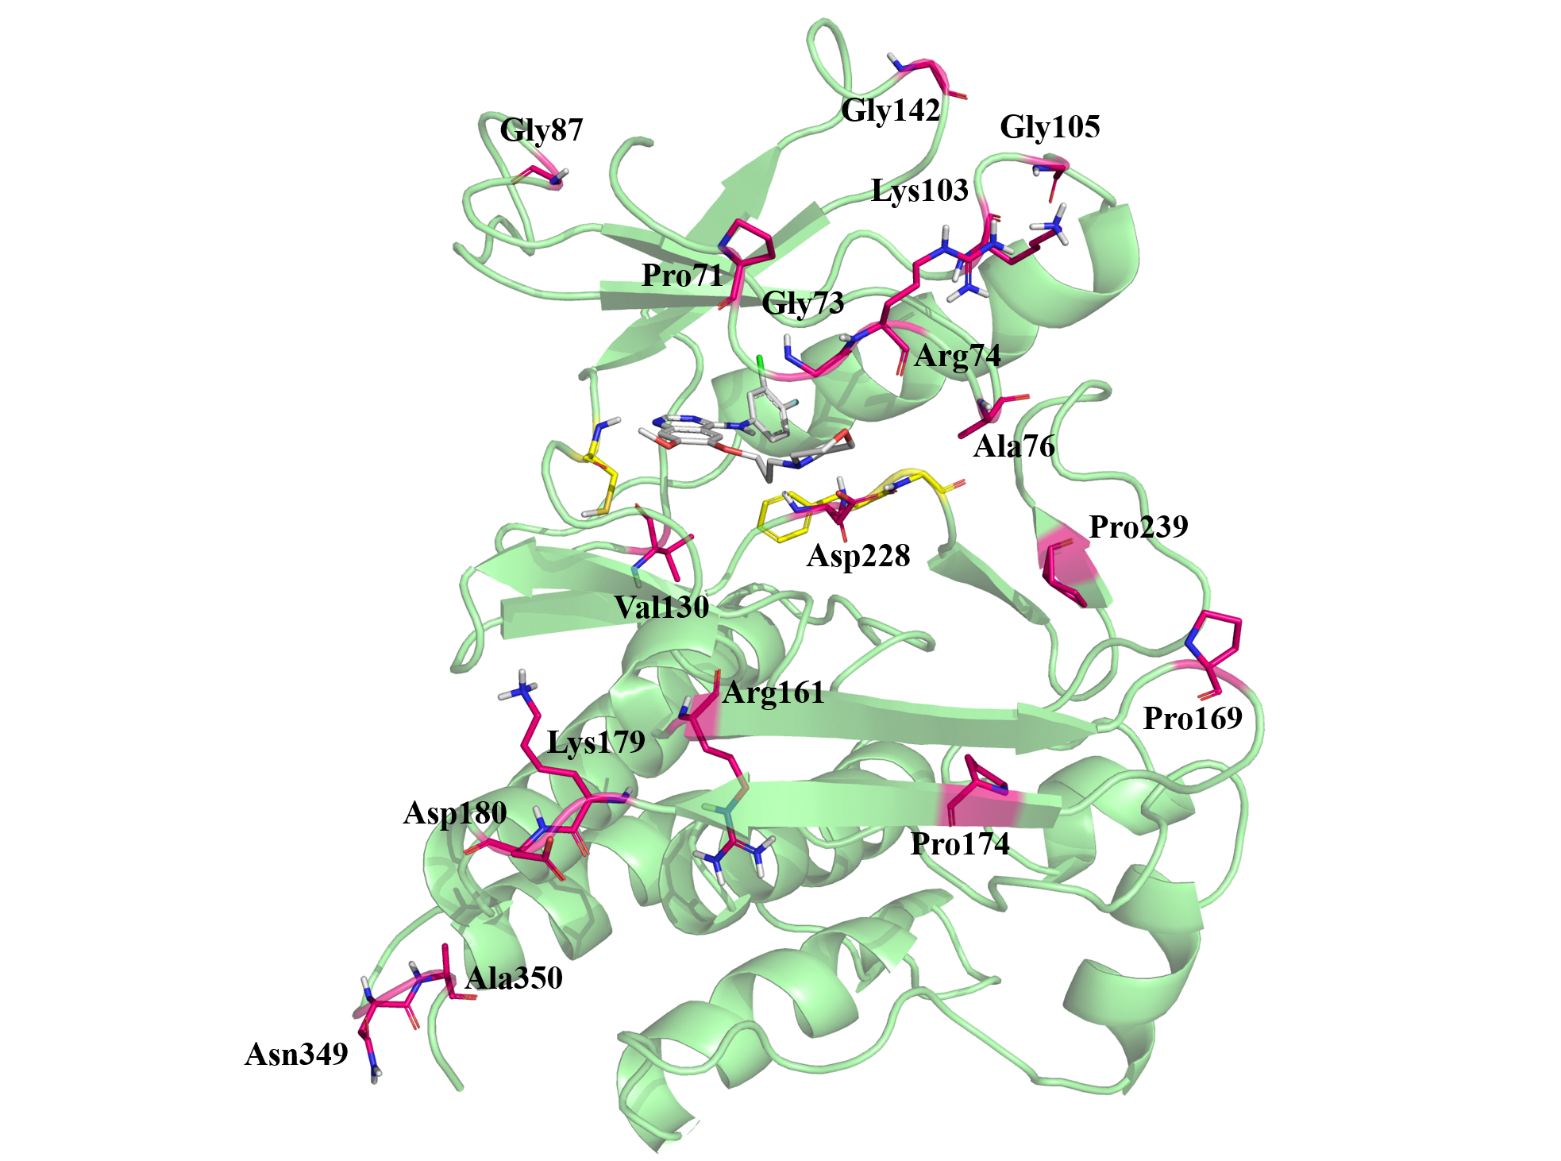


**Fig. S6** 3D model based on 4ASE sequence superposed with gefetinib in complex with the template (2ITY). Carbons atoms in White: gefitinib (ligand); Magenta: amino acids presented in disallowed region of the Ramachandran plot; Yellow: Methionine of the *Hinge region* e amino acids of the DFG motif (aspartate, phenylalanine e glycine) (Plotted with PyMol program (ref: The PyMOL Molecular Graphics System, Version 1.8 Schrödinger, LLC.).


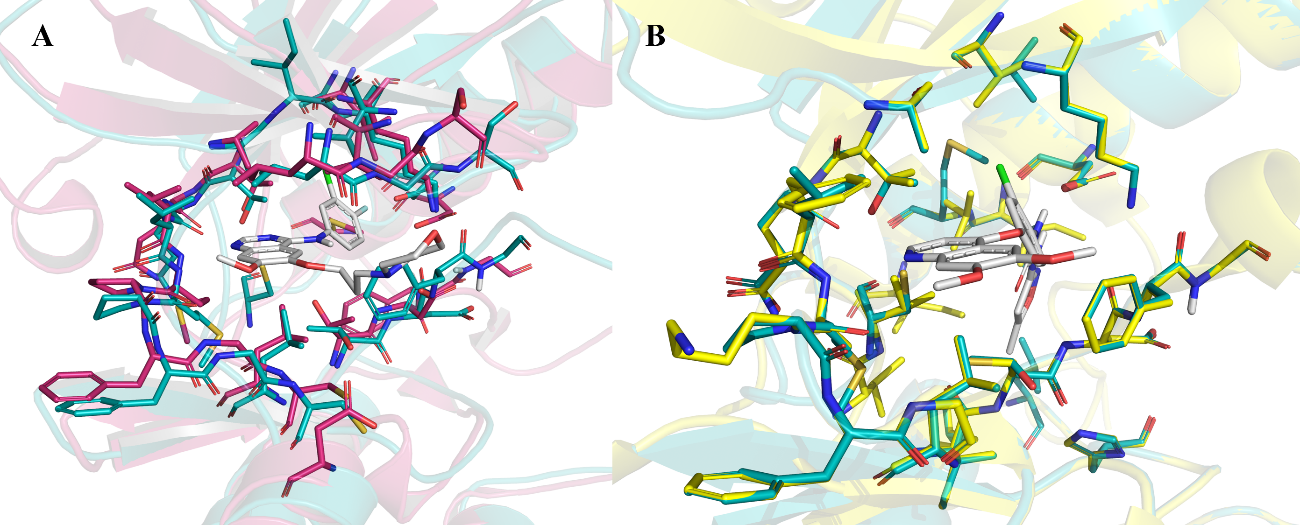


**Fig. S7 A)** Superposition of the chimeric conformational model and the native structure (2ITY), with gefitinib in complex with 2ITY (residues at 4Å around the ligand are highlighted). **B)** Superposition of the 3D model and the template (4ASE), with tivozanib in complex with 4ASE (residues at 4 Å around the ligand are highlighted). White: ligand (A: gefitinib, B: tivozanib); Cyan: 3D model; Magenta: native structure (2ITY); Yellow: template structure (4ASE).


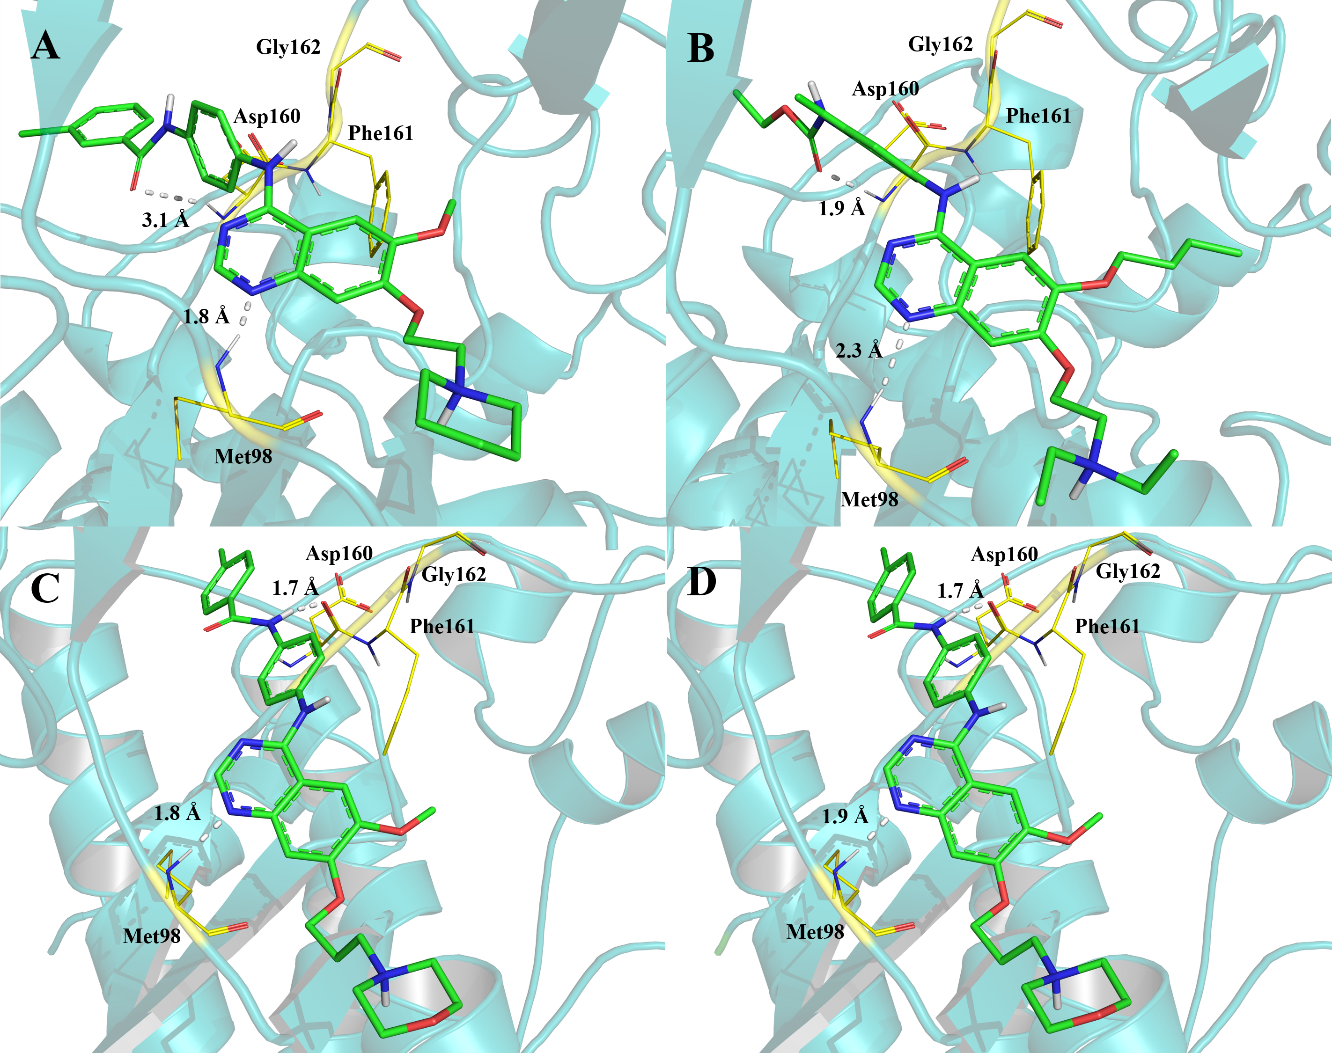


**Fig. S8**Interaction profile of the 4 best ranked dual compounds at top10%

with the GoldScore function (A: compound **47**; B: compound **32** ; C: compound **45** ; D: compound **43**).

**Scheme 1S**. Synthetic route employed to prepare compounds LASSBio-1535 (**5**), LASSBio-1695 (**6**), LASSBio-1697 (**7**), LASSBio-1698 (**8**), LASSBio-1616 (**9**), LASSBio-2227 (**10**), LASSBio-2228 (**11**), LASSBio-2229 (**12**), LASSBio-2230 (**13**), LASSBio-2231 (**14**), LASSBio-2232 (**15**) and LASSBio-2233 (**16**).

**Synthetic Methodology**:

Synthesis of ethyl (2-phenylimidazo[1,2-a]pyridin-3-yl)glycinate (**S4**):

Benzaldehyde (1 mmol), 2-aminopyridine (1 mmol) and ethyl 2-isocyanoacetate(1 mmol) were dissolved in 3 mL EtOH. Glacialacetic acid (2 mmol) was added. The reaction mixture was stirredat room temperature overnight and, after the conclusion of the reaction was confirmed by TLC, solvent was evaporated todryness. The residue was taken up in aqueous KHCO3 andextracted with EtOAc. Further purification was performed by column chromatography using dichloromethane as eluent, furnishing the desired product (**S4**) in 65% yield.

Synthesis of 2-((2-phenylimidazo[1,2-*a*]pyridin-3-yl)amino)acetohydrazide (**S5**):

A round-bottomed flask charged with 2 mmol of the ethyl ester (**S4**), hydrazine hydrate 80% solution (20equiv.) and ethanol (5 mL), was stirred and heated at reflux for 3 hours, when TLC indicated total consumption of the starting ester. To the resulting mixture was added ice and the precipitate formed was filtered out and washed with cold water to give the desired hydrazide (**S5**) in 72% yield.

General procedure for the synthesis of the target imidazo[1,2-*a*]pyridine-N-glycinyl-hydrazone derivatives (**5** – **16**):

In a round flask containing the hydrazide (**S5**) (1.6 mmol) dissolved in ethanol (8 mL), was added the respective aromatic aldehyde(1.68 mmol; 1.05 equiv.) and catalytic concentrated hydrochloric acid. The mixture was stirred for about 2 hours at room temperature. At the end of the reaction, the solvent was reduced under reduced pressure and the resulting reaction mixture was poured into crushed ice to promote intense precipitation. Finally,the precipitate formed was filtered out, washed with water and cold hexane. Sometimes, to achieve the adequate purity (>95%) it was necessary to perform a column chromatography using dichloromethane/methanol (100% DCM to 90% DCM/10% MeOH gradient elution) as eluent to furnish the title *N*-acylhydrazone compounds (**10 - 16**), as described next.

**(E)-*N*'-(4-methoxybenzylidene)-2-((2-phenylimidazo[1,2-a]pyridin-3-yl)amino)acetohydrazide – LASSBio-2227 (10):**

White powder purified by silica gel chromatography after elution with dichloromethane/methanol (gradient), 82% yield, m.p. = 154-155ºC.

**H1-NMR (DMSO-*d6* - 400 MHz):** Somesignals are doubled due to the presence of 2 rotamers(proportion of 6:4 approximately)–11.45 (s, 1H, NHC=O, major) and 11.33 (s, 1H, NHC=O, minor); 8.81 (d, 1H, HAr, minor) e 8.74 (d, 1H, HAr, major); 8.13 (t, 2H, HAr); 8.04 (s, 1H, CH=N, minor)and 7.86 (s, 1H, CH=N, major); 7.72 to 7.21 (m, 8H, HAr); 6.97 (d, 2H, HAr, minor) and 6.91 (d, 2H, HAr, major); 5.73 (t, 1H, NH-CH2, minor) and 5.61 (t, 1H, NH-CH2, major); 4.18 (d, 2H, NH-CH2, major)and 3.84 (d, 2H, NH-CH2, minor); 3.78 (s, 3H, OCH3, major) and 3.76 (s, 3H, OCH3, minor).

**C13-NMR (DMSO-*d6* - 100 MHz):** Somesignals are doubled due to the presence of 2 rotamers(proportion of 6:4 approximately) – 171.5; 166.7; 160.8; 160.6; 146.6; 143.5; 138.3; 138.0; 128.8; 128.6; 128.3; 128.2; 127.6; 127.4; 126.7; 126.6; 126.4; 125.3; 125.2; 114.3; 114.2; 114.0; 113.7; 55.3; 55.2; 49.0; 47.5.

**(E)-*N*'-(3,4-dimethoxybenzylidene)-2-((2-phenylimidazo[1,2-a]pyridin-3-yl)amino)acetohydrazide – LASSBio-2228 (11):**

White powder purified by silica gel chromatography after elution with dichloromethane/methanol (gradient), 85% yield, m.p. = 145-146ºC.

**H1-NMR (DMSO-*d6* - 400 MHz):** Some signals are doubled due to the presence of 2 rotamers(proportion of 6:4 approximately) – 11.31 (s, 1H, NHC=O, major) and 11.23 (s, 1H, NHC=O, minor); 8.56 (d, 1H, HAr, minor) and 8.50 (d, 1H, HAr, major); 8.16 (d, 2H, HAr); 7.98 (s, 1H, CH=N, minor) and 7.83 (s, 1H, CH=N, major); 7.44 (m, 4H, HAr, major) and 7.28 (m, 3H, HAr, minor); 7.18 to 6.85 (m, 5H, HAr); 5.34 (t, 1H, NH-CH2, minor) and 5.20 (t, 1H, NH-CH2, major); 4.17 (d, 2H, NH-CH2, major) and 3.74 (d, 2H, NH-CH2, minor); 3.78 (s, 3H, OCH3, major) and 3.75 (s, 3H, OCH3, minor); 3.78 (s, 3H, OCH3, major) and 3.66 (s, 3H, OCH3, minor).

**C13-NMR (DMSO-*d6* - 100 MHz):** Some signals are doubled due to the presence of 2 rotamers(proportion of 6:4 approximately) – 172.0; 167.0; 150.7; 150.4; 149.0; 148.9; 147.0; 146.9; 143.6; 140.4; 140.2; 134.6; 134.5; 133.4; 132.8; 128.4; 128.3; 127.0; 126.9; 126.8; 126.7; 126.6; 126.5; 126.4; 126.3; 124.2; 124.0; 123.9; 123.7; 121.7; 121.1; 116.5; 111.4; 111.0; 110.9; 108.2; 108.1; 55.6, 55.5; 55.4; 55.3; 49.6; 48.0.

**(E)-*N*'-(4-hydroxy-3-methoxybenzylidene)-2-((2-phenylimidazo[1,2-a]pyridin-3-yl)amino)acetohydrazide – LASSBio-2229 (12):**

White powder purified by silica gel chromatography after elution with dichloromethane/methanol (gradient), 74% yield, m.p. = 159-160ºC.

**H1-NMR (DMSO-*d6* - 400 MHz):** Somesignals are doubled due to the presence of 2 rotamers(proportion of 6:4 approximately) – 11.25 (s, 1H, NHC=O, major) and 11.16 (s, 1H, NHC=O, minor); 9.52 (s, 1H, OH, minor) and 9.45 (s, 1H, OH, major); 8.55 (d, 1H, HAr, minor) and 8.48 (d, 1H, HAr, major); 8.16 (d, 2H, HAr); 7.93 (s, 1H, CH=N, minor) and 7.79 (s, 1H, CH=N, major); 7.44 (m, 4H, HAr, major) and 7.29 (m, 4H, HAr, minor); 7.22 to 6.85 (m, 4H, HAr); 6.80 (d, 1H, HAr, minor) and 6.74 (d, 1H, HAr, major); 5.32 (t, 1H, NH-CH2, minor) and 5.18 (t, 1H, NH-CH2, major); 4.14 (d, 2H, NH-CH2, major)and 3.72 (d, 2H, NH-CH2, minor); 3.79 (s, 3H, OCH3, minor) and 3.68 (s, 3H, OCH3, major).

**C13-NMR (DMSO-*d6* - 100 MHz):** Somesignals are doubled due to the presence of 2 rotamers(proportion of 6:4 approximately) – 171.9; 166.9; 148.9; 148.6; 148.0; 147.8; 144.0; 143.9; 140.4; 140.3; 134.6; 134.5; 133.4; 132.9; 128.5; 128.4; 128.3; 127.0; 126.7; 126.5; 126.4; 126.3; 125.5; 125.3; 124.2; 124.0; 123.8; 122.0; 121.1; 116.6; 116.5; 115.4; 115.3; 111.0; 110.9; 109.2; 109.0; 55.6; 55.3; 49.6; 48.0.

**(E)-*N*'-(3-hydroxy-4-methoxybenzylidene)-2-((2-phenylimidazo[1,2-a]pyridin-3-yl)amino)acetohydrazide – LASSBio-2230 (13):**

White powder purified by silica gel chromatography after elution with dichloromethane/methanol (gradient), 78% yield, m.p. = 240-241ºC.

**H1-NMR (DMSO-*d6* - 400 MHz):** Somesignals are doubled due to the presence of 2 rotamers(proportion of 6:4 approximately) –11.53 (s, 1H, NHC=O, minor) and 11.30 (s, 1H, NHC=O, major); 9.29 (s, 1H, OH, minor) and 9.19 (s, 1H, OH, major); 9.05 (d, 1H, HAr, minor) and 8.97 (d, 1H, HAr, major); 8.12 (d, 2H, HAr); 7.97 (s, 1H, CH=N, minor) and 7.79 (s, 1H, CH=N, major); 7.91 (m, 4H, HAr, major) and7.51 (m, 4H, HAr,minor); 7.60 (t, 2H, HAr); 7.15 (d, 1H, HAr, minor) and 7.00 (d, 1H, HAr, major); 6.91 (m, 2H, HAr); 6.08 (t, 1H, NH-CH2, minor) and 5.92 (t, 1H, NH-CH2, major); 4.20 (d, 2H, NH-CH2, major)and 3.79 (d, 2H, NH-CH2, minor); 3.77 (s, 3H, OCH3).

**C13-NMR (DMSO-*d6* - 100 MHz):** Somesignals are doubled due to the presence of 2 rotamers(proportion of 6:4 approximately) – 171.2; 166.4; 149.7; 149.6; 148.8; 148.7; 147.2; 147.0; 146.8; 146.7; 144.1; 136.4; 136.3; 132.6; 129.4; 129.3; 129.2; 128.2; 128.0; 126.9; 126.8; 126.7; 126.2; 123.3; 123.2; 120.1; 119.6; 115.9; 115.8; 112.3; 111.8; 111.6; 55.6; 55.5; 48.5; 47.3.

**(E)-*N*'-(3,4-dihydroxybenzylidene)-2-((2-phenylimidazo[1,2-a]pyridin-3-yl)amino)acetohydrazide – LASSBio-2231 (14):**

White powder purified by silica gel chromatography after elution with dichloromethane/methanol (gradient), 60% yield, m.p. = 239-240ºC.

**H1-NMR (DMSO-*d6* - 400 MHz):** Some signals are doubled due to the presence of 2 rotamers(proportion of 6:4 approximately) – 11.22 (s, 1H, NHC=O, major) and 11.11 (s, 1H, NHC=O, minor); 9.37 (s, 1H, OH, minor) and 9.33 (s, 1H, OH, major); 9.22 (s, 1H, OH, minor) and 9.09 (s, 1H, OH, major); 8.53 (d, 1H, HAr, minor) and 8,45 (d, 1H, HAr, major); 8.16 (d, 2H, HAr); 7.87 (s, 1H, CH=N, minor) and 7.76 (s, 1H, CH=N, major); 7.46 (m, 4H, HAr, major) and 7.30 (m, 4H, HAr, minor); 7.20 to 6.69 (m, 5H, HAr); 5.31 (t, 1H, NH-CH2, minor) and 5.08 (t, 1H, NH-CH2, major); 4.11 (d, 2H, NH-CH2, major) and 3.71 (d, 2H, NH-CH2, minor).

**C13-NMR (DMSO-*d6* - 100 MHz):** Some signals are doubled due to the presence of 2 rotamers(proportion of 6:4 approximately) – 171.9; 167.3; 148.4; 148.1; 147.8; 146.1; 146.0; 144.7; 140.9; 135.1; 135.0; 133.9; 133.8; 128.9; 128.8; 127.3; 127.2; 127.1; 126.9; 126.8; 126.0; 125.8; 124.6; 124.5; 124.4; 124.3; 120.9; 120.4; 117.1; 117.0; 116.0; 115.9; 113.1; 112.9; 111.6; 111.5; 50.0; 48.4.

**(E)-*N*'-(3-hydroxybenzylidene)-2-((2-phenylimidazo[1,2-a]pyridin-3-yl)amino)acetohydrazide – LASSBio-2232 (15):**

Yellow powder purified by silica gel chromatography after elution with dichloromethane/methanol (gradient), 68% yield, m.p. = 233-234ºC.

**H1-NMR (DMSO-*d6* - 400 MHz):** Some signals are doubled due to the presence of 2 rotamers(proportion of 6:4 approximately) – 11.39 (s, 1H, NHC=O, major) and 11.30 (s, 1H, NHC=O, minor); 9.59 (s, 1H, OH, minor) and 9.50 (s, 1H, OH, major); 8.54 (d, 1H, HAr, minor) and 8.46 (d, 1H, HAr, major); 8.17 (d, 2H, HAr); 7.97 (s, 1H, CH=N, minor)and 7.84 (s, 1H, CH=N, major); 7.45 to 6.88 (m, 9H, HAr,); 6.80 (d, 1H, HAr, minor) and 6.75 (d, 1H, HAr, major); 5.33 (t, 1H, NH-CH2, minor) and 5.12 (t, 1H, NH-CH2, major); 4.14 (d, 2H, NH-CH2, major)and 3.73 (d, 2H, NH-CH2, minor).

**C13-NMR (DMSO-*d6* - 100 MHz):** Some signals are doubled due to the presence of 2 rotamers(proportion of 6:4 approximately) – 171.8; 167.3; 148.4; 148.1; 147.8; 146.1; 146.0; 144.7; 140.9; 135.1; 135.0; 133.9; 133.8; 128.9; 128.8; 127.3; 127.2; 127.1; 126.9; 126.8; 126.0; 125.8; 124.6; 124.5; 124.4; 124.3; 120.9; 120.4; 117.1; 117.0; 116.0; 115.9; 113.1; 112.9; 111.6; 111.5; 50.0; 48.4.

**(E)-2-((2-phenylimidazo[1,2-a]pyridin-3-yl)amino)-*N*'-(pyridin-3-ylmethylene)acetohydrazide – LASSBio-2233 (16):**

White powder purified by silica gel chromatography after elution with dichloromethane/methanol (gradient), 62% yield, m.p. = 170-172ºC.

**H1-NMR (DMSO-*d6* - 400 MHz):** Some signals are doubled due to the presence of 2 rotamers(proportion of 6:4 approximately) – 11.94 (s, 1H, NHC=O, minor) and 11.67 (s, 1H, NHC=O, major); 9.02 (d, 1H, HAr, minor) and 8.93 (d, 1H, HAr, major); 8.77 (s, 1H, HAr, minor) and 8.69 (s, 1H, HAr, major); 8.58 (d, 1H, HAr, minor) and 8.53 (d, 1H, HAr, major); 8.20 (s, 1H, CH=N, minor) and 7.98 (s, 1H, CH=N, major); 8.13 to 7.83 (m, 5H, HAr,);7.60 to 7.40 (m, 5H, HAr,); 6.08 (t, 1H, NH-CH2, minor) and 5.94 (t, 1H, NH-CH2, major); 4.25 (d, 2H, NH-CH2, major)and 3.84 (d, 2H, NH-CH2, minor).

**C13-NMR (DMSO-*d6* - 100 MHz):** Some signals are doubled due to the presence of 2 rotamers(proportion of 6:4 approximately) – 171.8; 167.1; 151.3; 150.3; 150.1; 148.2; 148.0; 143.9; 140.8; 136.7; 136.6; 133.7; 133.5; 132.0; 130.0; 129.9; 129.2; 129.1; 129.0; 128.0; 127.8; 127.6; 127.0; 126.8; 126.1; 125.9; 124.0; 123.9; 115.6; 115.5; 112.0; 48.6; 47.3.
